# Supplementary material for: The effects of Lactobacillus plantarum on small intestinal barrier function and mucosal gene transcription; a randomized double-blind placebo controlled trial
Source: PubMed Central journal article supplement (PMC5206730; doi:10.1038/srep40128), 2017-01-03

## Supplementary Information

**The effects of *Lactobacillus plantarum* on small intestinal barrier function and mucosal gene transcription; a randomized double-blind placebo controlled trial.**

Zlatan Mujagic<sup>1,2</sup>, Paul de Vos<sup>1,3</sup>, Mark V. Boekschoten<sup>1,4</sup>, Coen Govers<sup>1,5</sup>, Harm-Jan H.M. Pieters<sup>2</sup>, Nicole J. W. de Wit<sup>5</sup>, Peter A. Bron<sup>1,6</sup>, Ad A.M. Masclee<sup>2</sup>, Freddy J. Troost<sup>1,2</sup>

*Supplementary Table I: List of tight junction, adherens junction and associated genes.*

Mean fold-change in expression of the three *L. plantarum* strains when compared to placebo and raw p-value calculated using the IBMT (Intensity-Based Moderated T-statistic) regularised paired t-test versus placebo. Statistically significant up- or downregulation presented in bold and with a \*.

| Gene ID | Official Symbol | Official Full Name                            | WCFS1<br>Mean FC | p-value     | CIP48<br>Mean FC | p-value | TIFN101<br>Mean FC | p-value |
|---------|-----------------|-----------------------------------------------|------------------|-------------|------------------|---------|--------------------|---------|
| 7082    | TJP1            | tight junction protein 1 (zonula occludens 1) | 1.09             | 0.13        | 1.06             | 0.21    | 1.04               | 0.52    |
| 9414    | TJP2            | tight junction protein 2 (zonula occludens 2) | 1.07             | 0.17        | 1.06             | 0.23    | -1.02              | 0.55    |
| 27134   | TJP3            | tight junction protein 3 (zonula occludens 3) | -1.03            | 0.69        | -1.05            | 0.50    | -1.02              | 0.79    |
| 9076    | CLDN1           | claudin 1                                     | -1.07            | 0.34        | -1.01            | 0.80    | -1.06              | 0.50    |
| 9075    | CLDN2           | claudin 2                                     | -1.18            | 0.56        | -1.04            | 0.67    | -1.17              | 0.24    |
| 1365    | CLDN3           | claudin 3                                     | 1.02             | 0.89        | -1.09            | 0.47    | 1.11               | 0.40    |
| 1364    | CLDN4           | claudin 4                                     | 1.08             | 0.50        | 1.04             | 0.87    | 1.08               | 0.36    |
| 7122    | CLDN5           | claudin 5                                     | <b>-1.17*</b>    | <b>0.02</b> | -1.03            | 0.60    | -1.04              | 0.48    |
| 9074    | CLDN6           | claudin 6                                     | 1.02             | 0.77        | -1.02            | 0.89    | -1.00              | 0.85    |
| 1366    | CLDN7           | claudin 7                                     | 1.03             | 0.62        | -1.02            | 0.81    | 1.07               | 0.24    |
| 9073    | CLDN8           | claudin 8                                     | -1.07            | 0.18        | -1.08            | 0.13    | -1.05              | 0.23    |
| 9080    | CLDN9           | claudin 9                                     | 1.04             | 0.51        | -1.09            | 0.17    | -1.03              | 0.73    |
| 9071    | CLDN10          | claudin 10                                    | -1.22            | 0.13        | 1.01             | 0.93    | -1.10              | 0.57    |
| 5010    | CLDN11          | claudin 11                                    | -1.03            | 0.73        | -1.05            | 0.46    | -1.02              | 0.79    |

Supplementary Table I continued

| Gene ID   | Official Symbol | Official Full Name                         | WCFS1<br>Mean FC | p-value | CIP48<br>Mean FC | p-value     | TIFN101<br>Mean FC | p-value     |
|-----------|-----------------|--------------------------------------------|------------------|---------|------------------|-------------|--------------------|-------------|
| 9069      | CLDN12          | claudin 12                                 | 1.00             | 0.98    | 1.03             | 0.61        | -1.00              | 0.93        |
| 23562     | CLDN14          | claudin 14                                 | -1.08            | 0.21    | -1.03            | 0.71        | -1.04              | 0.52        |
| 24146     | CLDN15          | claudin 15                                 | -1.01            | 0.93    | -1.06            | 0.48        | 1.09               | 0.31        |
| 10686     | CLDN16          | claudin 16                                 | 1.02             | 0.66    | -1.02            | 0.81        | 1.00               | 0.79        |
| 26285     | CLDN17          | claudin 17                                 | -1.07            | 0.26    | -1.11            | 0.12        | -1.10              | 0.07        |
| 149461    | CLDN19          | claudin 19                                 | -1.11            | 0.11    | <b>-1.15*</b>    | <b>0.04</b> | -1.02              | 0.72        |
| 49861     | CLDN20          | claudin 20                                 | -1.00            | 0.96    | 1.03             | 0.49        | 1.06               | 0.31        |
| 100132463 | CLDN24          | claudin 24                                 | -1.02            | 0.56    | 1.03             | 0.36        | -1.01              | 0.74        |
| 56650     | CLDND1          | claudin domain containing 1                | 1.03             | 0.54    | 1.00             | 0.97        | -1.05              | 0.30        |
| 100506658 | OCLN            | occludin                                   | 1.06             | 0.36    | -1.03            | 0.68        | -1.03              | 0.51        |
| 4638      | MYLK            | myosin light chain kinase                  | 1.01             | 0.78    | 1.10             | 0.09        | 1.03               | 0.51        |
| 85366     | MYLK2           | myosin light chain kinase family, member 2 | -1.08            | 0.11    | -1.07            | 0.16        | -1.07              | 0.16        |
| 91807     | MYLK3           | myosin light chain kinase family, member 3 | -1.06            | 0.24    | -1.03            | 0.60        | 1.01               | 0.99        |
| 340156    | MYLK4           | myosin light chain kinase family, member 4 | 1.02             | 0.69    | 1.05             | 0.33        | -1.00              | 0.94        |
| 103910    | MYL12B          | myosin, light chain 12B, regulatory        | -1.05            | 0.44    | -1.05            | 0.42        | -1.06              | 0.30        |
| 87        | ACTN1           | actinin, alpha 1                           | 1.03             | 0.69    | 1.01             | 0.99        | 1.15               | 0.05        |
| 88        | ACTN2           | actinin, alpha 2                           | 1.01             | 0.82    | -1.03            | 0.52        | -1.02              | 0.63        |
| 89        | ACTN3           | actinin, alpha 3                           | -1.03            | 0.59    | -1.01            | 0.70        | 1.03               | 0.49        |
| 81        | ACTN4           | actinin, alpha 4                           | 1.05             | 0.31    | -1.05            | 0.27        | <b>1.11*</b>       | <b>0.03</b> |
| 5934      | RBL2            | retinoblastoma-like 2 (P130)               | 1.07             | 0.23    | 1.02             | 0.66        | 1.02               | 0.74        |
| 6709      | SPTAN1          | spectrin, alpha, non-erythrocytic 1        | -1.03            | 0.60    | 1.02             | 0.65        | 1.02               | 0.75        |
| 57530     | CGN             | cingulin                                   | 1.04             | 0.57    | -1.03            | 0.85        | 1.01               | 0.97        |
| 8189      | SYMPK           | symplekin                                  | -1.01            | 0.97    | -1.07            | 0.23        | 1.02               | 0.67        |
| 999       | CDH1            | E-cadherin                                 | -1.01            | 0.85    | -1.02            | 0.75        | 1.00               | 0.82        |

*Supplementary Table II: Randomization schedule*

Subject numbers (and test period schedules) were assigned to participants in chronological order of inclusion. The supplements were distributed under double-blind conditions. The codes represented the following supplements: a = placebo, b = *L. plantarum* WCFS1, c = *L. plantarum* CIP4448, d = *L. plantarum* TIFN101.

| Subject number | Test period 1 | Test period 2 | Test period 3 | Test period 4 |
|----------------|---------------|---------------|---------------|---------------|
| 001            | c             | a             | b             | d             |
| 002            | a             | d             | c             | b             |
| 003            | b             | c             | d             | a             |
| 004            | d             | a             | c             | b             |
| 005            | c             | d             | a             | b             |
| 006            | a             | b             | d             | c             |
| 007            | b             | d             | c             | a             |
| 008            | d             | b             | a             | c             |
| 009            | c             | b             | a             | d             |
| 010            | a             | c             | b             | d             |

**Supplementary Figure 1: L/R ratio in 0-5h urine; small intestinal permeability**

Intestinal permeability test before, *i.e.* day -3 (baseline 1), day 0 (baseline 2), and 7 days after start of the intervention. During the latter two time points subjects were challenged with indomethacin.

Scatterplot with median L/R ratio presented. Differences tested with related samples Wilcoxon signed rank test.

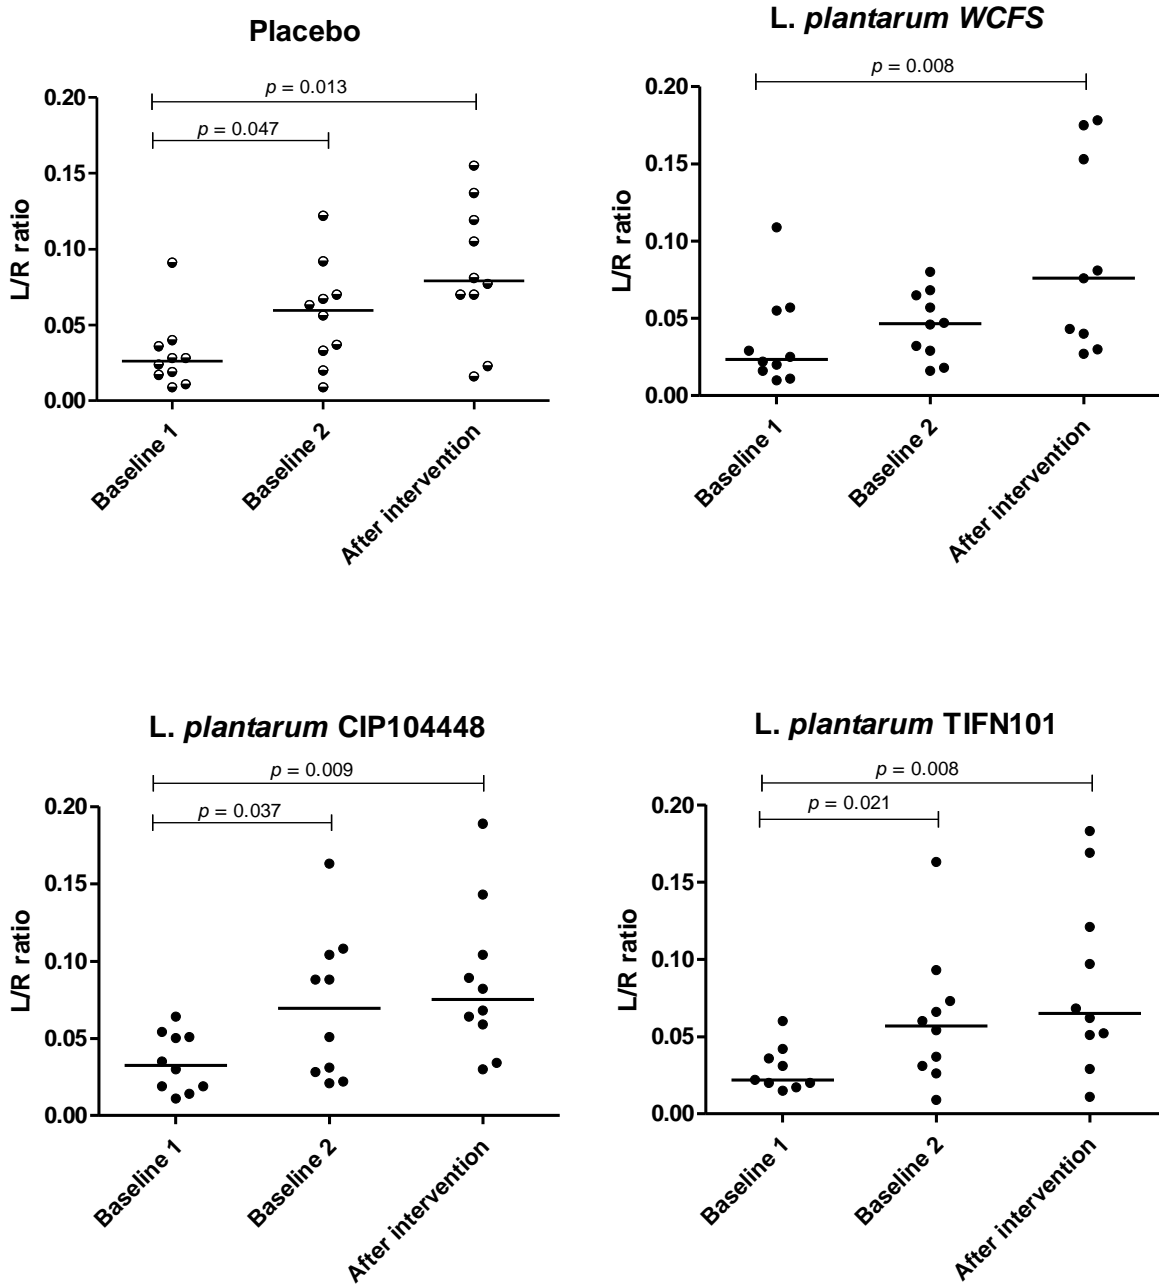

*Supplementary Figure II: RT-qPCR results*

Transcription (normalised expression ratios) of ZO-1, claudin 3 and 4, occludin and MLCK in duodenal mucosal biopsies. No statistically significant differences observed as tested by related samples Wilcoxon signed rank test.

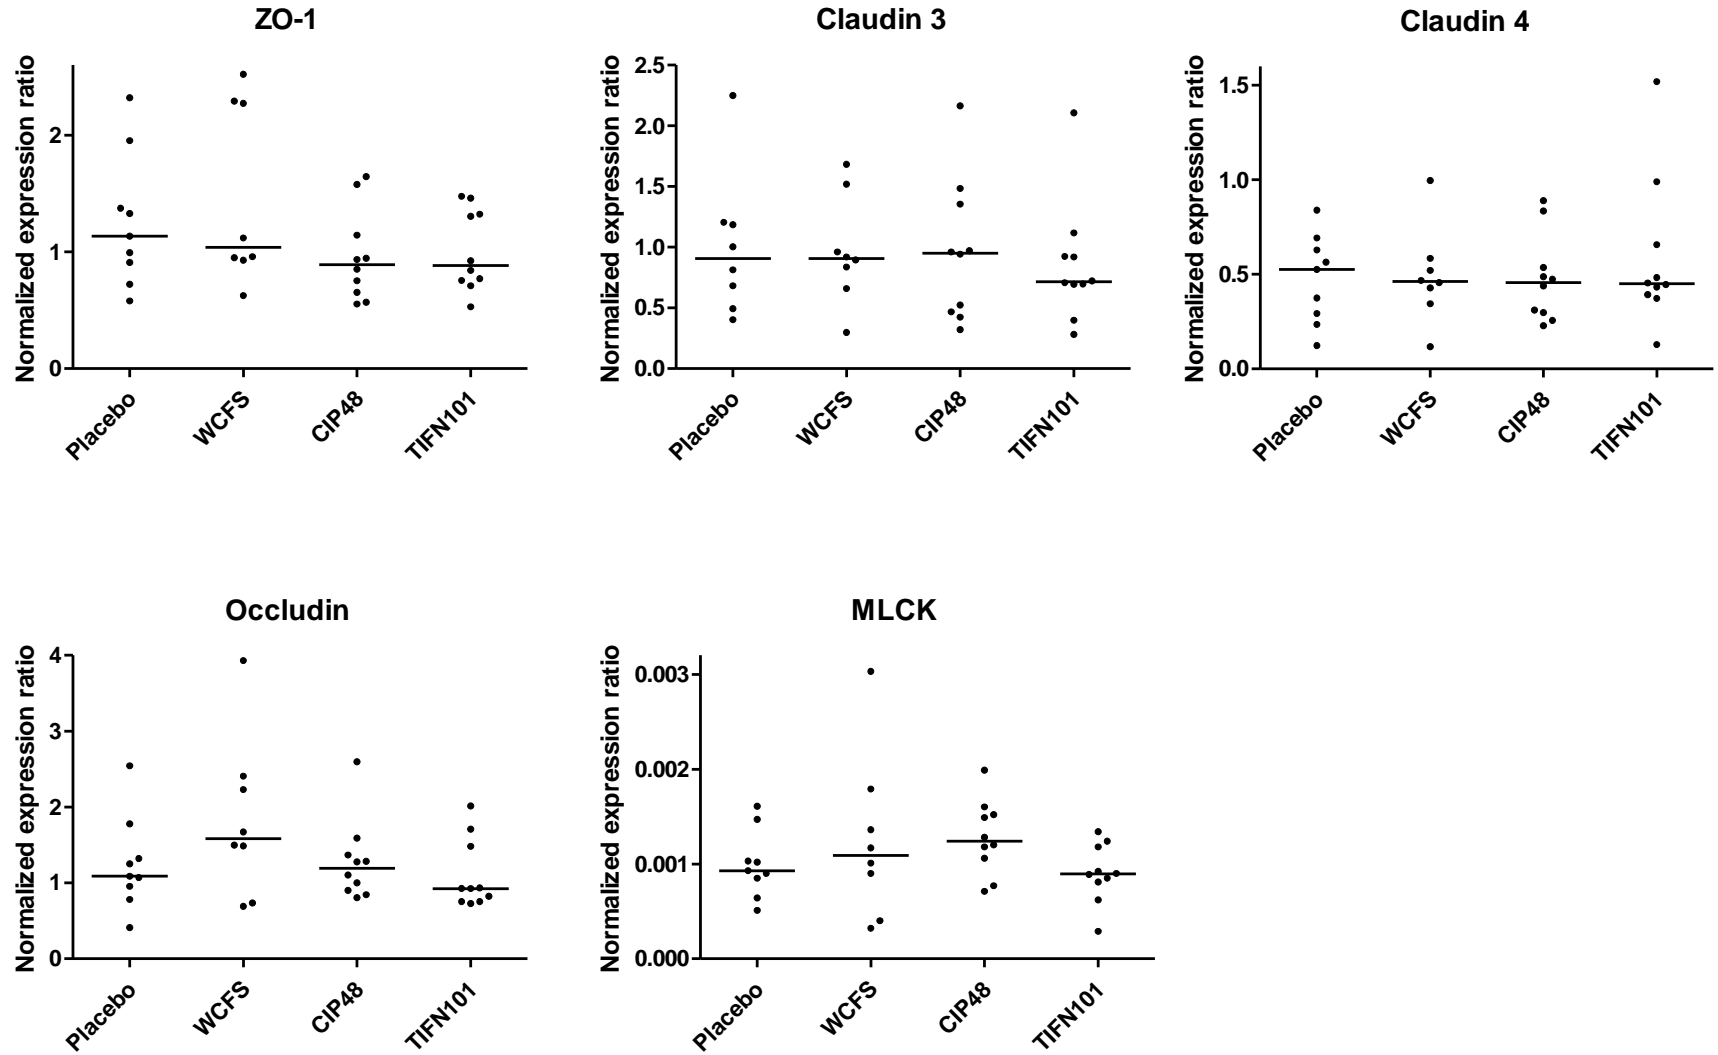

Supplementary Figures III: All presented canonical pathways are significantly modulated by *L. plantarum* WCFS1, CIP48 and/or TIFN 101 when compared to placebo. Green and red colours indicate down or upregulation of genes, respectively. Grey indicates the regulation did not reach statistical significance.

Supplementary Figure III-a: TCA cycle II pathway, dowregulated by *L. plantarum* TIFN 101

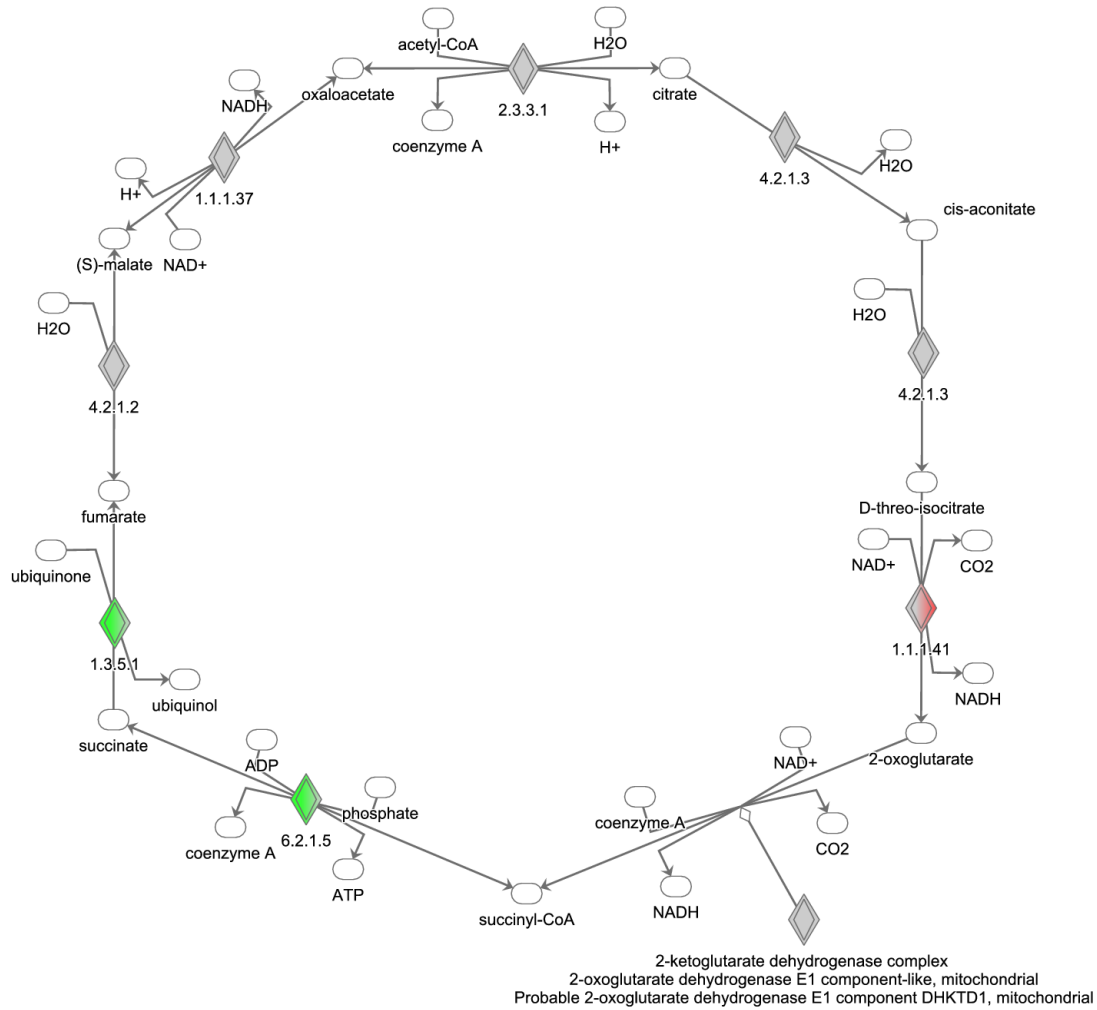

Supplementary Figure III-b: DNA double-strand break repair by homologous recombination pathway, upregulated by *L. plantarum* WCFS1

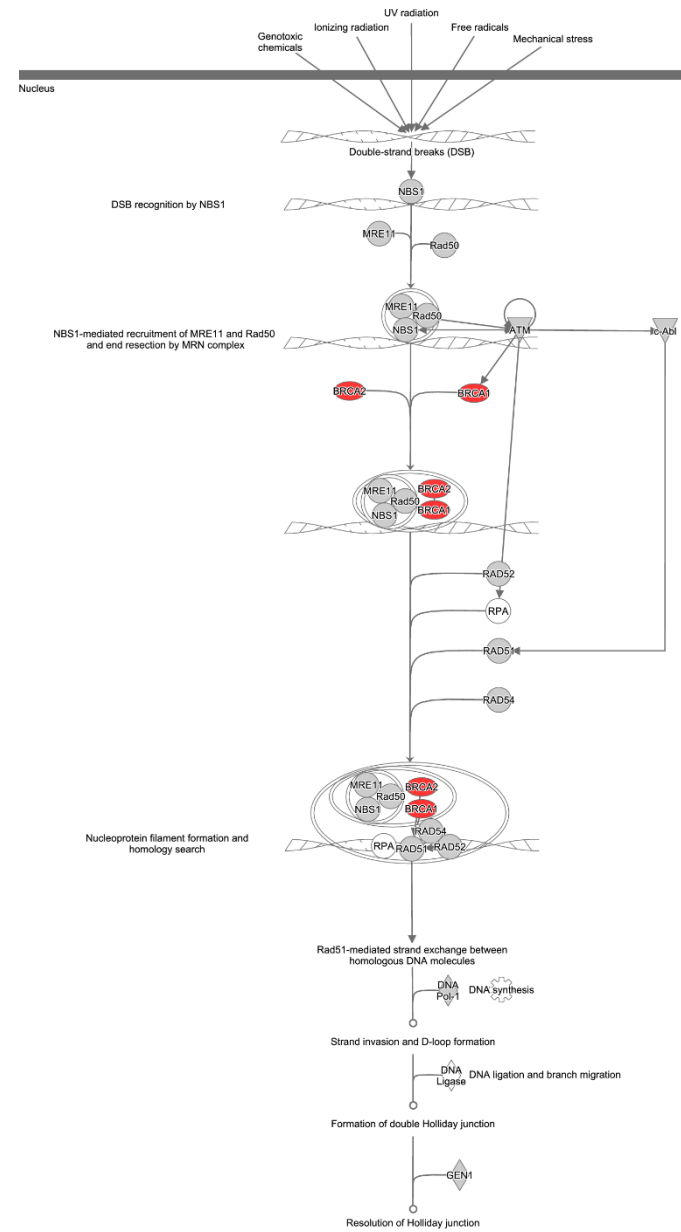

Supplementary Figure III-c: Cell cycle: G2/M DNA damage checkpoint regulation pathway, upregulated by *L. plantarum* WCFS1

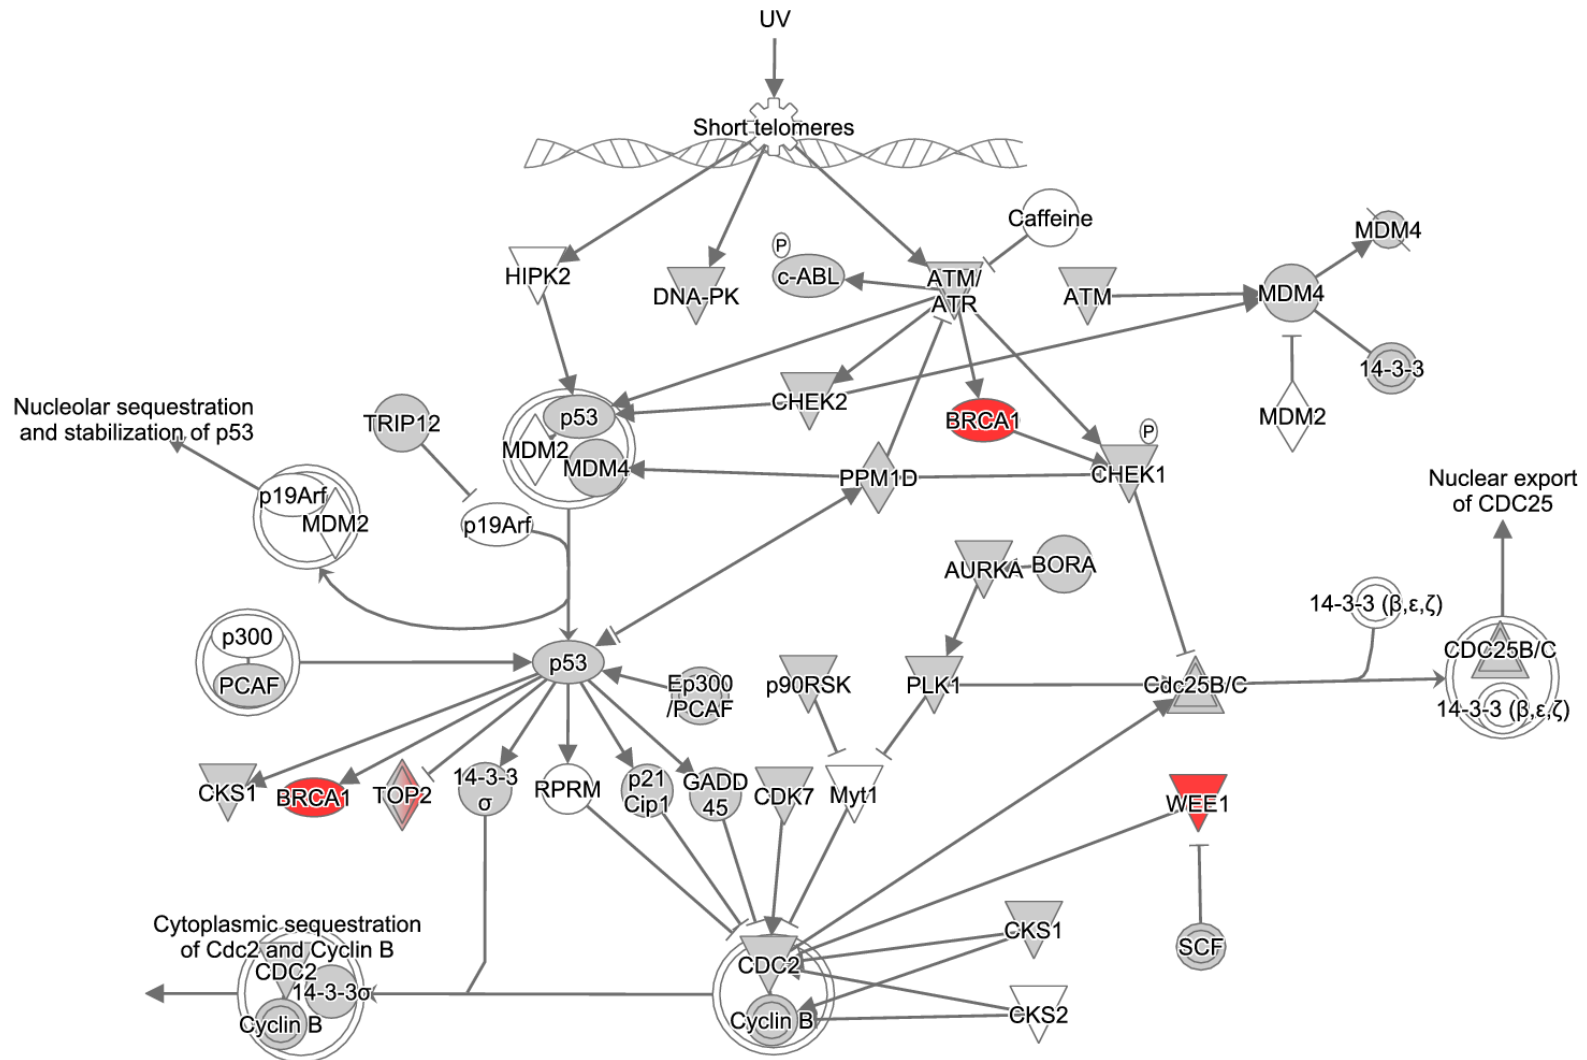



Supplementary Figure III-d: DNA double-strand break repair by homologous recombination pathway, upregulated by *L. plantarum* CIP48

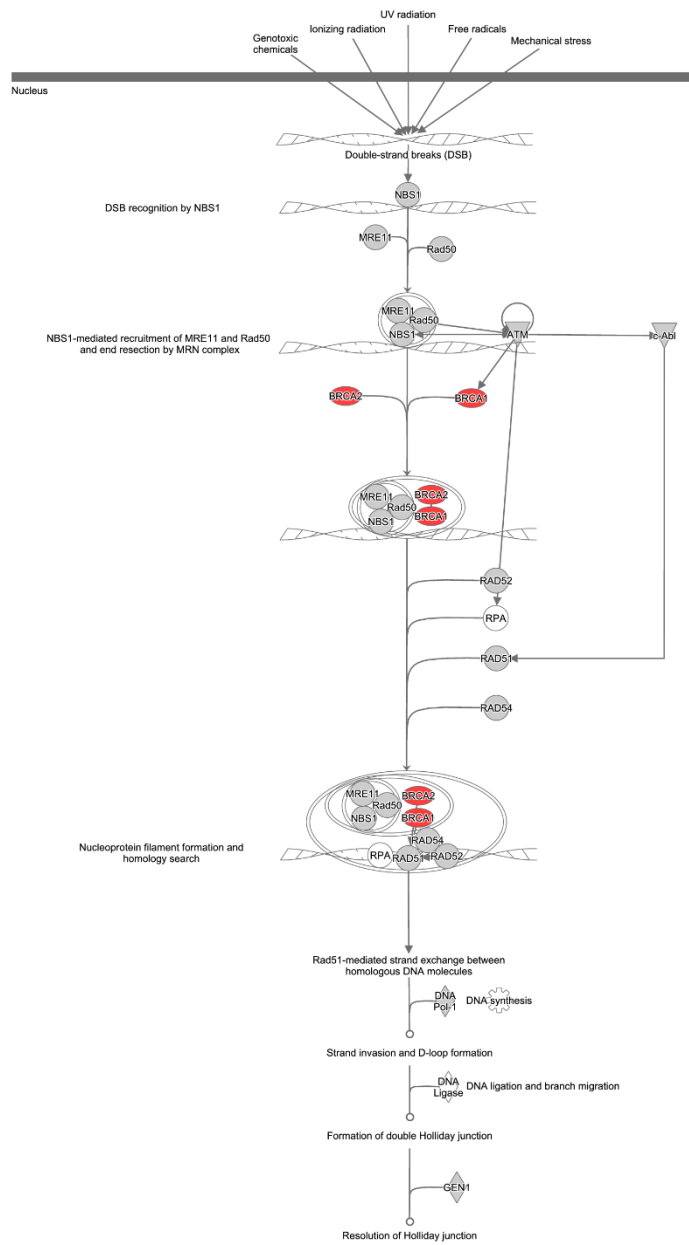

Supplement: srep40128-s1.pdf [file srep40128-s1.pdf]
